# Supplementary material for: Inappropriate Heart Rate Response to Hypotension in Critically Ill COVID-19-Associated Acute Kidney Injury
Source: MDPI journal article supplement (doi:10.3390/jcm10061317), 2021-03-23
Supplement: s1 [file s1]

**Table S1.** Sensitivity analysis: linear regression using a stepwise backward selection fitting the relationship between changes in heart rate during CVVHDF-induced hypotension in critically ill patients and associated dependent variables.

| Variables        | Estimate * heart rate change †,<br>bpm | 95% CI       | p value |
|------------------|----------------------------------------|--------------|---------|
| COVID-19 status  | -12.12                                 | -19.52– 4.72 | 0.003   |
| Change in MABP † | -0.27                                  | -0.57–0.03   | 0.07    |
| PEEP ‡           | 1.42                                   | -0.38–3.22   | 0.11    |

Definitions of abbreviations: CI, confidence interval; COVID-19, Coronavirus infectious disease 2019; CVVHDF, continuous venovenous hemodiafiltration; MABP, mean arterial blood pressure; PEEP, positive end-expiratory pressure.

\* Estimates the independent effect of each included variable (COVID-19 status, MABP change and PEEP level) on heart rate changes during DIH.

† Parameters at the time of CVVHDF-induced hypotension onset minus parameter at the time of last hemodynamic monitoring before CVVHDF-induced hypotension (maximum of two hours before)

‡ At the time of last hemodynamic monitoring before CVVHDF-induced hypotension (maximum of two hours before)
